# Supplementary material
Source: PubMed Central journal article supplement (PMC6233746)
Supplement: jamadermatol-154-1159-s001.pdf [file jamadermatol-154-1159-s001.pdf]

## Supplementary Online Content

Onega T, Barnhill RL, Piepkorn MW, et al. Accuracy of Digital Pathologic Analysis vs Traditional Microscopy in the Interpretation of Melanocytic Lesions. *JAMA Dermatol*. Published online August 15, 2018. doi:10.1001/jamadermatol.2018.2388

**eFigure 1.** Pathologist Recruitment for Digital v. Glass Study

**eFigure 2.** Intraobserver reproducibility (% agreement) by phase II medium (glass or digital) for pathologists who interpreted the same cases in Phase I in glass format.

**eTable.** Odds ratio (OR) estimates and 95% confidence intervals for the effect of digital whole slide image vs glass slide interpretation on various measures of assessment certainty.

This supplementary material has been provided by the authors to give readers additional information about their work.

**eFigure 1.** Pathologist Recruitment for Digital v. Glass Study

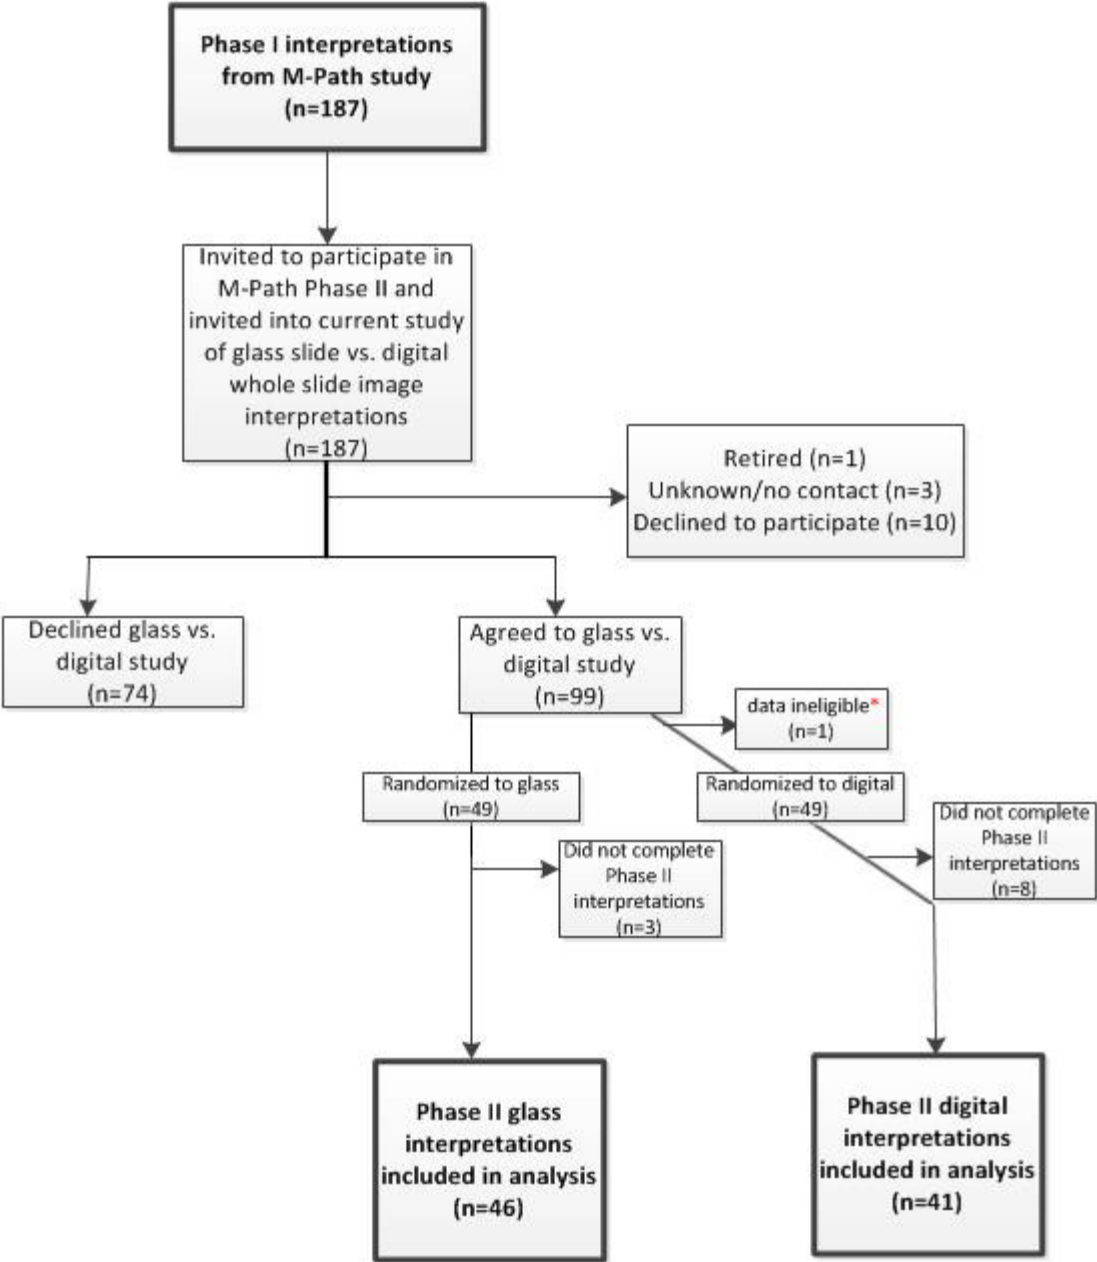

\* One participant is excluded from analysis due to requesting to be placed into the digital arm

**eFigure 2.** Intraobserver reproducibility (% agreement) by phase II medium (glass or digital) for pathologists who interpreted the same cases in Phase I in glass format.

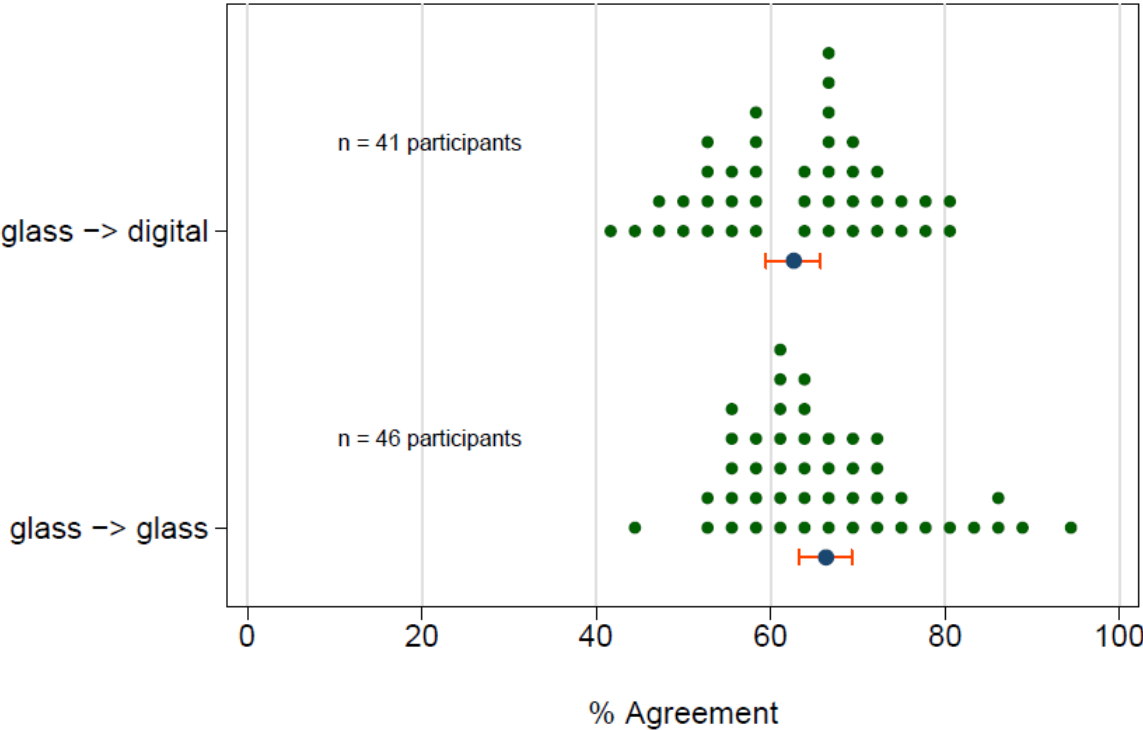

eTable. Odds ratio (OR) estimates and 95% confidence intervals for the effect of digital whole slide image vs glass slide interpretation on various measures of assessment certainty.

| Assessment certainty measures                             | Total case interpretations<br>n (col %) | Digital WSI<br>n (col %) | Glass<br>n (col %)     | OR (95% CI)                | P-value | *Adjusted         |         |
|-----------------------------------------------------------|-----------------------------------------|--------------------------|------------------------|----------------------------|---------|-------------------|---------|
|                                                           |                                         |                          |                        |                            |         | OR (95% CI)       | P-value |
| Level of diagnostic difficulty<br>Low (1-3)<br>High (4-6) | 2,041 (65)<br>1,091 (35)                | 916 (62)<br>560 (38)     | 1,125 (68)<br>531 (32) | -ref-<br>1.30 (0.84, 2.01) | 0.25    | 1.14 (0.74, 1.75) | 0.55    |
| Confidence in assessment<br>High (1-3)<br>Low (4-6)       | 2,447 (78)<br>685 (22)                  | 1,102 (75)<br>374 (25)   | 1,345 (81)<br>311 (19) | -ref-<br>1.47 (0.86, 2.51) | 0.16    | 1.25 (0.75, 2.10) | 0.39    |
| Would ask for a second opinion<br>No<br>Yes               | 1,744 (56)<br>1,388 (44)                | 823 (56)<br>653 (44)     | 921 (56)<br>735 (44)   | -ref-<br>0.99 (0.63, 1.58) | 0.98    | 0.87 (0.55, 1.39) | 0.56    |
| Case is borderline between two diagnoses<br>No<br>Yes     | 2,363 (76)<br>767 (24)                  | 1,069 (72)<br>407 (28)   | 1,296 (78)<br>360 (22) | -ref-<br>1.37 (0.97, 1.94) | 0.075   | 1.37 (0.96, 1.96) | 0.084   |

\* From models which include a covariate to adjust for Dermatopathology board certification or fellowship training.
